# Supplementary material for: Viral control is required for intravenous BCG-mediated protection against tuberculosis in simian immunodeficiency virus-infected macaques
Source: Research Square preprint supplement (doi:10.21203/rs.3.rs-8225191/v1), 2025-12-10
Supplement: Supplementary file 1 [file 16432aef1211c8eab8d88301.docx]

**Supplemental information:**

**Viral control is required for intravenous BCG-mediated protection against tuberculosis in simian immunodeficiency virus-infected macaques.**

**Supplementary Data 1**

**Supplementary Data 1: Representative gating strategy and antibody panel for phenotyping of immune cells in airways (Figure 2a and Extended Data figure 2a).** Cells recovered by BAL were stained immediately after collection without stimulation using the antibodies listed. Myeloid populations were gated for CD11b+, CD11b+CD11c+, and CD11c+. Lymphocytes were gated for T cells (CD3+), B cells (CD3-CD20+), and NK cells (CD3-CD8𝛼+ CD159a+CD16 CD159a+, CD16+). Total T cells and T cell subsets were gated from the T cell gate (CD3+) and include CD4+, CD4+CD8𝛼+, CD8𝛼𝛼+, and CD8𝛼𝛽+, Vγ9+ γδ and Vγ9-γδ T cells.

**Supplementary Data 2**

**Supplementary Data 2: Representative gating strategy and antibody panel for intracellular immune response in airway cells (Figures 2b, 2c, and Extended Data Figure 2)**. Cells recovered by BAL were stimulated with mycobacteria WCL and stained with the antibodies listed. Lymphocytes and singlets were gated. Live CD3-CD20- cells were gated first. CD3-CD8a+ cells were then gated for NK cells (CD159a+CD16+) and T cells (CD3+). Finally, γδ+ T cells and memory T cells were gated with CD28 and CD45RA. Mycobacteria WCL-stimulated CD4+ T cells were gated for IFNγ, IL-2, IL-17, and TNF, along with CD69. Stimulated CD8𝛼𝛼+, CD8𝛼𝛽+, and NK cells were gated for GzmB and GzmK against SSC-A. Cytotoxic effectors and cytokines are highlighted in purple and green, respectively.

**Supplementary Data 3**

**Supplementary Data 3: Representative gating strategy and antibody panel for phenotyping immune cells in tissues (Figure 5a and Extended Data Figure 2b).** Single-cell suspensions from tissues were stained using the listed antibodies without stimulation. Live cells were gated for singlets, then myeloid populations were gated for CD11b+, CD11b+CD11c+, and CD11c+. Lymphocytes were gated for T cells (CD3+), B cells (CD3-CD20+), and CD3-CD20- cells were gated for NK cells (CD3-CD8𝛼+). Total T cells and T cell subsets were gated from the T cell gate (CD3+) and include CD4+, CD4+CD8𝛼+, CD8𝛼𝛼+, CD8𝛼𝛽+, Vγ9+ γδ, and Vγ9-γδ T cells.

**Supplementary Data 4**

**Supplementary Data 4: Representative gating strategy and antibody panel for intracellular immune responses in cells from lung tissue (Figures 5b, 5c, and 6).** Cells from lung tissue were stimulated with mycobacteria WCL and stained with the listed antibodies. Singlets were gated from live cells, and then lymphocytes were gated from singlets. Live CD3-CD20- cells were gated for NK cells (CD3-CD8𝛼+), T cells (CD3+), and γδ+ T cells. Mycobacteria WCL-stimulated CD4+ T cells were gated for IFNγ, IL-2, IL-17, and TNF, along with CD69. FoxP3, RORγT, and T-bet were gated from unstimulated CD4+ T cells. CD8𝛼𝛼+, CD8𝛼𝛽+, and NK cells were gated for granulysin, GzmB, GzmK and perforin against SSC-A. Cytotoxic effectors, transcription factors, and cytokines are highlighted in purple, green, and blue, respectively.
